eased tissue, it would be worthwhile to test the pathogenic properties of these strains in experimental animals. Until the pathogenicity of these *Hartmannella* strains is proven, species of this genus should be treated as harmless commensals.

We were surprised to read that a species, called "*H. varini*," was used as a reference strain in the investigation of Aimard et al. [2]. To our knowledge, this species has not been described in the literature, and it is not listed in any of the definitive naked amoeba identification keys reported by Page [4–6]. In addition, it does not correspond to either of the two new *Hartmannella* species that have recently been described [7, 8]. Furthermore, there is no reference strain of a species of this name held by either the Culture Collection of Algae and Protozoa (Ambleside, United Kingdom) or the American Type Culture Collection (Rockville, MD). The use of "*H. varini*" as a reference strain appears to have been invalid. We would be interested to know from where Aimard et al. [2] obtained this strain and where (if at all) it was described in the literature.

#### Johan F. De Jonckheere and Susan Brown

Protozoology Laboratory, Scientific Institute of Public Health—Louis Pasteur, Brussels, Belgium; and Culture Collection of Algae and Protozoa, Institute of Freshwater Ecology, Ambleside, Cumbria, United Kingdom

#### References

- De Jonckheere JF, Brown S. There is no evidence that the free-living amoeba *Hartmannella* is a human parasite [letter]. *Clin Infect Dis* 1998;26:773.
- Aimard L, Brasseur P, Favennec L, Perrine D, Watt L, Brasseur G. Amebic keratitis due to a mixed infection with *Acanthamoeba* and *Hartmannella* species. *Clin Infect Dis* 1998;26:187–8.
- De Jonckheere JF, Brown S. Non-*Acanthamoeba* amoeba infection. *J Infect* 1998;36:349–50.
- Page FC. Marine Gymnamoebae. Cambridge, United Kingdom: Institute of Terrestrial Ecology, 1983:1–54.
- Page FC. A new key to freshwater and soil Gymnamoebae. Ambleside, United Kingdom: Freshwater Biological Association, 1988:1–122.
- Page FC. Nackte rhizopoda. In: Page FC, Siemmensma FJ, eds. *Nackte rhizopoda und heliozoa*. Stuttgart, Germany: Gustav Fischer Verlag, 1991:1–170.
- Smirnov AV. Two new species of marine amoebae: *Hartmannella lobifera* n. sp. and *Korotnevella nivo* n. sp. (Lobosea, Gymnamoebida). *Arch Protistenkd* 1996/1997;147:283–92.
- Anderson OR, Rogerson A, Hannah F. Three new limax amoebae isolated from marine surface sediments: *Vahlkampfia caledonica* n. sp., *Saccamoeba marina* n. sp., and *Hartmannella vacuolata* n. sp. *J Eukaryot Microbiol* 1997;44:33–42.

Reprints or correspondence: Dr. Johan F. De Jonckheere, Protozoology Laboratory, Scientific Institute of Public Health—Louis Pasteur, J. Wytsmanstraat 14, B-1050 Brussels, Belgium.

Clinical Infectious Diseases 1998;27:1337–8

© 1998 by the Infectious Diseases Society of America. All rights reserved. 1058-4838/98/2705-0051\$03.00

#### Reply

SIR—We read with great interest the letter of De Jonckheere and Brown about our recent brief report [1]. We agree with De Jonckheere and Brown that *Hartmannella* should not be considered a pathogen without testing its pathogenic properties in experimental animals. However, culture of a corneal biopsy specimen yielded

*Hartmannella* cysts and *Acanthamoeba* cysts and confirmed results of a histological microscopic examination. The conditions used to process the sample excluded the possibility of contamination with *Hartmannella*. Moreover, this amoeba was not present on the superficial layers of the corneal biopsy specimen since scrapings were negative. In addition, the *Hartmannella* isolate found in the cornea was related to failure of hexamidine therapy, which may raise the question about the pathogenicity of *Hartmannella* as was previously suggested [2, 3].

"*H. varini*," which was used as a reference strain, corresponded to *Hartmannella vermiformis* and was provided by the Culture Collection of Algae and Protozoa (Ambleside, United Kingdom; reference 1534/7).

#### Laurence Aimard, Philippe Brasseur, Loïc Favennec, Daniel Perrine, Laure Watt, and Gérard Brasseur

Département d'Ophtalmologie and Laboratoire de Parasitologie, Hôpital Charles Nicolle, Rouen, and Laboratoire de Parasitologie, Faculté de Pharmacie, University of Caen, Caen, France

#### References

- Aimard L, Brasseur P, Favennec L, Perrine D, Watt L, Brasseur G. Amebic keratitis due to a mixed infection with *Acanthamoeba* and *Hartmannella* species. *Clin Infect Dis* 1998;26:187–8.
- Aitken D, Hay J, Kinnear FB, Kirkness CM, Lee WR, Seal DV. Amebic keratitis in a wearer of disposable contact-lenses due to a mixed *Vahlkampfia* and *Hartmannella* infection. *Ophthalmology* 1996;103:485–94.
- Kennedy SM, Devine P, Hurley C, Ooi Y-S, Collum LMT. Corneal infection associated with *Hartmannella vermiformis* in a contact lens wearer. *Lancet* 1995;346:637–8.

Reprints or correspondence: Dr. L. Aimard, Laboratoire de Parasitologie, Hôpital Charles Nicolle, 1 Rue de Germont, F-76031 Rouen Cedex, France.

Clinical Infectious Diseases 1998;27:1338

© 1998 by the Infectious Diseases Society of America. All rights reserved. 1058-4838/98/2705-0052\$03.00

#### Pneumococcal Pericarditis Since 1980

SIR—Saenz et al. [1] reported a case of purulent pericarditis caused by a highly resistant strain of *Streptococcus pneumoniae* that was successfully treated with vancomycin. With the prevalence of penicillin-resistant *S. pneumoniae* isolates approaching 16% in a New York City Department of Health survey from January to September 1997 (of which 10% had intermediate-level resistance and 6% had high-level resistance), one may expect more of such cases (written communication, New York City Department of Health).

A 75-year-old woman with cirrhosis and breast cancer who was being treated with tamoxifen presented with fever, chills, cough, and pleuritic chest pain. Physical examination revealed a pulsus paradoxus and a pericardial friction rub. A chest radiograph demonstrated right-lower-lobe pneumonia; a two-dimensional echocardiogram showed a large pericardial effusion, and cardiac tamponade was revealed with use of a Swan-Ganz catheter. Pericardiocentesis was done, and 300 mL of fluid was aspirated; the WBC count in the pericardial fluid was 265,000/mm<sup>3</sup>. A pericardial window was formed, and an external drain was placed.

**Table 1.** Summary of data on 15 cases of pneumococcal pericarditis from 1980 to 1998.

| [Reference] | Age (y)/sex | Culture specimen(s)                        | Risk factor(s)                                   | Source          | Medical treatment          | Surgical treatment                                                        | Outcome   |
|-------------|-------------|--------------------------------------------|--------------------------------------------------|-----------------|----------------------------|---------------------------------------------------------------------------|-----------|
| [1]         | 78/F        | Blood, PCF                                 | Diabetes                                         | Lung            | Vancomycin                 | Pericardiocentesis                                                        | Recovered |
| [3]         | 64/M        | Blood, PLF, CIE* PCF                       | Felty's syndrome                                 | Lung            | Cephapirin sodium          | Chest tube, pericardial window, pleural decortication                     | Recovered |
| [3]         | 60/M        | Blood, PLF, sputum, CIE* PCF               | Renal insufficiency, cardiac disease, alcoholism | Lung            | Penicillin                 | Chest tube, pericardiocentesis, pericardial window, pleural decortication | Recovered |
| [4]         | 31/M        | Blood                                      | Alcoholism                                       | None            | Penicillin                 | Pericardial drainage (surgical)                                           | Died      |
| [5]         | 19/F        | PCF                                        | Common variable immunodeficiency                 | Lung            | Penicillin                 | Pericardial catheter drainage, chest tube                                 | Recovered |
| [6]         | 88/F        | Blood                                      | None                                             | Lung            | Penicillin                 | Pericardial catheter drainage                                             | Recovered |
| [7]         | 32/F        | Blood, PLF                                 | HIV infection, CNS lymphoma, TB                  | Lung            | Penicillin                 | Subxiphoid pericardiotomy, chest tube                                     | Recovered |
| [7]         | 27/F        | PLF                                        | HIV infection, TB                                | Lung            | Penicillin                 | Subxiphoid pericardiotomy, chest tube                                     | Recovered |
| [8]         | 47/M        | PCF                                        | None                                             | Lung            | Penicillin                 | Pericardial window, pericardiocentesis                                    | Recovered |
| [9]         | 78/F        | PCF                                        | NA                                               | NA              | Antibiotics                | Intrapericardial streptokinase, pericardiocentesis                        | Recovered |
| [10]        | 29/M        | PCF                                        | None                                             | Lung            | Antibiotics                | Pericardiocentesis                                                        | Died      |
| [11]        | 3.5/M       | Blood, PCF, peritoneal, middle ear exudate | None                                             | Otitis media    | Penicillin                 | Pericardiocentesis, pericardial window, laparotomy                        | Recovered |
| [12]        | 57/F        | Blood, PCF                                 | Sarcoidosis, steroid therapy                     | Lung            | Penicillin, clarithromycin | Pericardiocentesis                                                        | Recovered |
| [13]        | 46/M        | Blood, PCF                                 | Alcoholism                                       | Shoulder injury | Penicillin                 | Pericardiocentesis, pericardial window, chest tube, I & D of shoulder     | Recovered |
| [PR]        | 75/F        | Blood, PCF                                 | Breast cancer, cirrhosis                         | Lung            | Penicillin                 | Pericardiocentesis, pericardial window                                    | Died      |

NOTE. CIE = counterimmunoelectrophoresis; I & D = incision and drainage; NA = not available; PCF = pericardial fluid; PLF = pleural fluid; PR = present report; TB = tuberculosis.

\* Organism detected using CIE; cultures were nondiagnostic, probably secondary to prior antibiotic therapy.

Cultures of both blood and pericardial fluid yielded *S. pneumoniae* susceptible to penicillin. Despite therapy, she died after 4 weeks.

In an autopsy series of cases of pericarditis before 1943 [2], pneumococcal pericarditis occurred in about 51% of cases, followed by staphylococcal pericarditis (19%), pericarditis due to other streptococci (10%), and pericarditis due to gram-negative bacilli (2%). These cases occurred primarily in children and young adults secondary to pneumonia. After 1943, there was a significant change in the etiology of pericarditis, with gram-negative bacilli, staphylococci, other streptococci, and pneumococci accounting for 32%, 22%, 13%, and 9% of the cases, respectively. The change in the microbiological spectrum was attributed to the advent of antibiotics, thoracic surgery, renal dialysis, and chemotherapy. The average age of a patient with pericarditis was 49 years; pericarditis was more likely to be seen in a debilitated adult with chronic disease, malignancy, or a history of thoracic surgery.

We reviewed cases of pneumococcal pericarditis since 1980 to see if age, risk factors, and prognosis were any different in the past 2 decades. A MEDLINE search revealed an additional 14 cases (table 1). The average age of the patients was 49 years

(range, 3.5 to 88 years). Risk factors included alcoholism, HIV infection, diabetes, renal insufficiency, common variable immunodeficiency, sarcoidosis, Felty's syndrome, and steroid therapy. The source of pericarditis was as follows: pneumonia or empyema, 11 cases; otitis media, 1; shoulder injury, 1; primary pericarditis (none), 1; and not available, 1. All the patients received antibiotics: penicillin, 10 cases; broad-spectrum antibiotics, 2; cephapirin sodium, 1; penicillin plus clarithromycin, 1; and vancomycin, 1. All the patients had some form of surgical intervention: chest tubes, 6 cases; pericardial window, 6; pericardial drainage with catheter, 2; surgical pericardial drainage, 1; subxiphoid pericardiotomy, 2; pericardiocentesis, 9; and intrapericardial instillation of streptokinase, 1.

Three patients died and 12 recovered. Ten blood cultures and nine pericardial fluid cultures yielded *S. pneumoniae*. Two pericardial cultures were negative, but counterimmunoelectrophoresis was positive for *S. pneumoniae* antigen.

There has been a dramatic decrease in the number cases of purulent pericarditis. The diagnosis is often delayed because classic signs of pulsus paradoxus, friction rub, distended neck veins, and distant heart

sounds may be absent or missed at initial presentation. Thus, a high index of suspicion is needed for patients who present with a history that predisposes them to purulent pericarditis. It is recognized only in about 18% of patients before death, and the mortality rate has approached 35%–40% [2]. Pneumococcal pericarditis is rare, and only 15 cases have been reported since 1980. In these cases, the mortality rate was 20% (three of 15); surprisingly, four (27%) of 15 patients had no risk factors, and only one of these patients would have qualified for receipt of the pneumococcal vaccine. The initial management of pneumococcal pericarditis includes pericardial drainage and therapy with vancomycin and a third-generation cephalosporin until results of susceptibility testing are available [1].

**Chi Go, Deborah S. Asnis, and Herbert Saltzman**

*Department of Internal Medicine, The New York Flushing Hospital, Flushing, New York*

## References

1. Saenz RE, Sanders CV, Aldridge KE, Patel MM. Purulent pericarditis with associated cardiac tamponade caused by a *Streptococcus pneumoniae* strain highly resistant to penicillin, cefotaxime, and ceftriaxone. *Clin Infect Dis* 1998;26:762–3.
2. Klacsmann PG, Bulkley BH, Hutchins GM. The changed spectrum of purulent pericarditis. An 86-year autopsy experience in 200 patients. *Am J Med* 1977;63:666–73.
3. Starling RC, Yu VL, Shillington D, Galgiani J. Pneumococcal pericarditis. Diagnostic usefulness of counter immunoelectrophoresis and computed tomographic scanning. *Arch Intern Med* 1986;146:1174–6.
4. Laaban JP, Roque d'Orbecastel O, Prudent J, de Fenoyl O, Rochemaure J. Primary pneumococcal pericarditis complicated by acute constriction. *Intensive Care Med* 1984;10:155–6.
5. Kocheril AG, Luttmann C, Sadaniantz A. Pneumococcal pericarditis successfully treated with catheter drainage and intravenous antibiotics. *Cathet Cardiovasc Diagn* 1991;24:286–7.
6. Thavendrarajah V, Ghia PS, Kozinn W, Little T. Catheter lavage and drainage of pneumococcal pericarditis. *Cathet Cardiovasc Diagn* 1993;29:322–4.
7. Karve MM, Murali MR, Shah HM, Phelps KR. Rapid evolution of cardiac tamponade due to bacterial pericarditis in two patients with HIV-1 infection. *Chest* 1992;101:1461–3.
8. Scully RE, Mark EJ, McNeely WF, McNeely BU. Case records of the Massachusetts General Hospital weekly clinicopathological conference: case 49-1990. *N Engl J Med* 1990;323:1614–24.
9. Maynar J, Corral E, Manzano A, et al. Intrapericardial streptokinase fibrinolysis in the management of purulent pneumococcal pericarditis. *Intensive Care Med* 1997;23:925–6.
10. Wass AR, Mann P, Wilson JI. Pneumococcal pericarditis presenting as an out of hospital cardiopulmonary arrest. *J Accid Emerg Med* 1997;14:261–3.
11. Lannigan FJ, Terry RM. Pericarditis and peritonitis secondary to otitis media. *J Laryngol Otol* 1988;102:717.
12. McMechan SR, Cochrane D, Adgey AAJ. Pneumococcal pericarditis—out of sight, out of mind? *Clin Cardiol* 1996;19:829–30.
13. Hood RL, Zenker MA. Pneumococcal pericarditis: a rare complication of pneumonia. *J Tenn Med Assoc* 1995;88:465–6.

Reprints or correspondence: Dr. Deborah Asnis, Department of Internal Medicine, The New York Flushing Hospital Medical Center, 4500 Parsons Boulevard, Flushing, New York 11355.

*Clinical Infectious Diseases* 1998;27:1338–40

© 1998 by the Infectious Diseases Society of America. All rights reserved.  
1058-4838/98/2705-0053\$03.00

## Endemic Lepromatous Leprosy

**SIR**—Although it was quite interesting to read the report of lepromatous leprosy in a renal transplant recipient [1], I was surprised that Mushatt et al. were permitted to speculate that the patient might represent a case of contact with armadillos, since he apparently grew up and lived in an area where leprosy is well known to be endemic—New Orleans and Baton Rouge in south Louisiana. In contrast, northern Louisiana has not been associated with the transmission of endemic leprosy until recently [2]; there have been virtually no other cases in these parishes where lifelong residents—with no contact with patients with leprosy—developed leprosy. In northern Louisiana, the argument is that armadillos are the only obvious source of *Mycobacterium leprae*. In contrast, it has been known for >200 years that living in south Louisiana poses some risk for the acquisition of leprosy without travel and without contact with patients with diagnosed cases. The risk pre-dates armadillos in Louisiana [2, 3].

In addition, the case report by Mushatt et al. nicely included HLAs (human leukocyte antigens) and showed once again that the risk of developing leprosy is associated with class II antigens. The analysis that we conducted, which included the six cases previously reported from northern Louisiana and a meta-analysis of data in the literature at that time, showed an association between lepromatous leprosy and HLA-DR2 and HLA-DQw1 [4]. Concerns about the pathogenesis, epidemiology, endemic transmission, and diagnosis of leprosy (including the acquisition of endemic disease) should continue to receive educational and research efforts, particularly in countries where it is endemic, such as the United States [5].

**Burton C. West**

*Department of Medicine, Meridia Huron Hospital, Cleveland, Ohio*

## References

1. Mushatt DM, Wattanamano P, Alvarado FS. Lepromatous leprosy in a renal transplant recipient. *Clin Infect Dis* 1998;26:217–8.
2. West BC, Todd JR, Lary CH, Blake LA, Fowler MER, King JW. Leprosy in six isolated residents of northern Louisiana. Time-clustered cases in an essentially nonendemic area. *Arch Intern Med* 1988;148:1987–92.
3. Blake LA, West BC, Lary CH, Todd JR IV. Environmental nonhuman sources of leprosy. *Rev Infect Dis* 1987;9:562–77.
4. Todd JR, West BC, McDonald JC. Human leukocyte antigen and leprosy: study in northern Louisiana and review. *Rev Infect Dis* 1990;12:63–74.
5. Editors. Leprosy beyond the year 2000 [editorial]. *Lancet* 1997;350:1717.

Reprints or correspondence: Dr. Burton C. West, Department of Medicine, Meridia Huron Hospital, 13951 Terrace Road, East Cleveland, Ohio 44112.

*Clinical Infectious Diseases* 1998;27:1340

© 1998 by the Infectious Diseases Society of America. All rights reserved.  
1058-4838/98/2705-0054\$03.00

## Reply

**SIR**—In his letter responding to our recent case report of leprosy in a renal transplant recipient [1], West expresses surprise that we were “permitted to speculate that the patient might represent a case of contact with armadillos. . . .” On the contrary, we stated that there was no direct contact with armadillos and that exposure
